# Supplementary material for: Bifunctional oxygen reduction/evolution reaction electrocatalysts achieved by axial ligand modulation on two-dimensional porphyrin frameworks
Source: Royal Society of Chemistry journal article supplement (doi:10.1039/d4cp01235f), 2024-01-01
Supplement: d4cp01235f1.pdf [file d4cp01235f1.pdf]

## Supporting Information

### **Bifunctional Oxygen Reduction/Evolution Reaction Electrocatalysts Achieved by Axial Ligands Modulation on Two-Dimensional Porphyrin Frameworks**

Tianze Xu, Tianyang Liu\* and Yu Jing\*

Jiangsu Co-Innovation Centre of Efficient Processing and Utilization of Forest Resources, College of Chemical Engineering, Nanjing Forestry University, Nanjing 210037, China

Email: [liutianyang@njfu.edu.cn](mailto:liutianyang@njfu.edu.cn); [yujing@njfu.edu.cn](mailto:yujing@njfu.edu.cn)

#### **1. Computational details**

##### **S1.1 Constant-Potential Calculations**

Via adjusting the work function, we changed the electric potential of electrochemical interface. It could be calculated by

$$U = (W_f - 4.60) + 0.0592 \times pH \quad (\text{S1})$$

where  $U$  is electrode potential referenced to RHE,  $W_f$  is the work function and 4.60 is the work function of  $\text{H}_2/\text{H}^+$  at standard conditions.<sup>1,2</sup> The work function could be controlled by altering the numbers of charges. When electrode potential at a fixed potential of RHE, electric potential referenced to SHE scale is also changed by the pH values. It was given by:

$$U_{\text{RHE}} = U_{\text{SHE}} + 0.0592 \times \text{pH} \quad (\text{S2})$$

According to Neurock methods,<sup>3</sup> the potential-dependent energy can be calculated by:

$$E(U) = E_{\text{DFT}} + \int_0^q \langle V_{\text{TOT}}^- \rangle dQ + qW_f \quad (\text{S3})$$

where  $E_{\text{DFT}}$  is the total energy of the unit cell calculated by DFT calculation,

$\int_0^q \langle V_{\text{TOT}}^- \rangle dQ$  is an integral from 0 to the system charge of the average electrostatic potential in the unit cell, and  $qW_f$  is given by the number of electrons (add and subtracted) multiplied by the work functions.

## S1.2 pH- and Potential-dependent Thermodynamics and Kinetics Calculations

The reaction energy barrier was simulated by adopting the climbing-image nudged elastic band (CI-NEB) method,<sup>4</sup> the Poisson-Boltzmann implicit solvation model was used to consider solvation effect,<sup>5,6</sup> the cavity setting in VASPsol was turned off to avoid numerical instabilities.

The  $\text{O}_2$  molecule diffusion, adsorption, and electrochemical steps for ORR equations (S1 to S6) and OER equations (S7 to S11) were presented below:

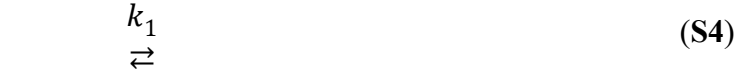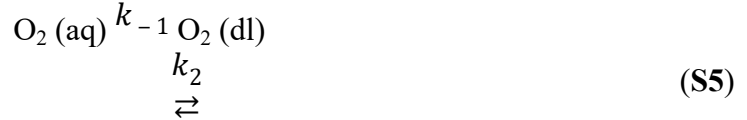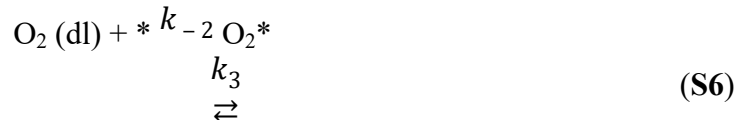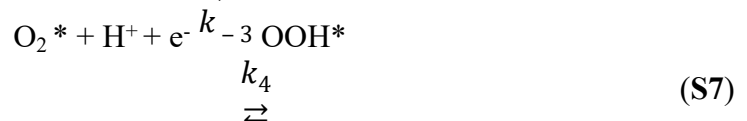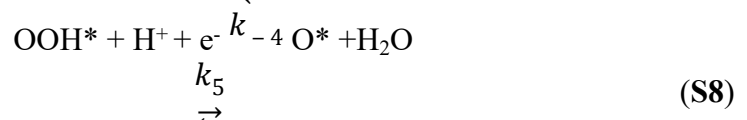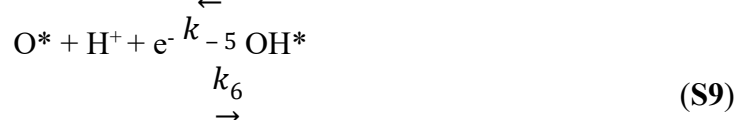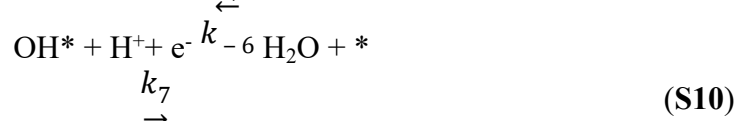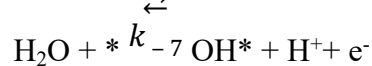

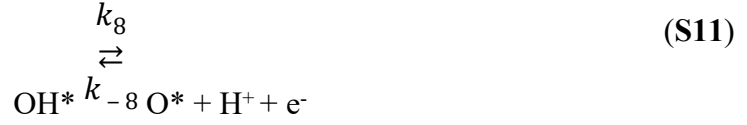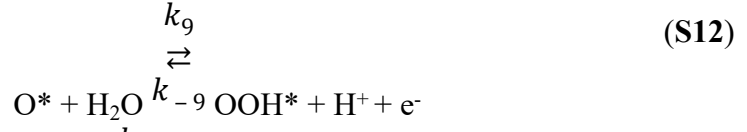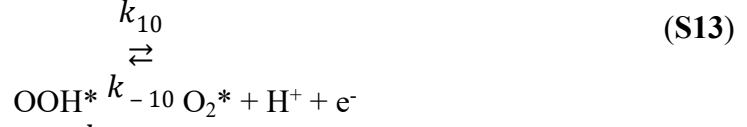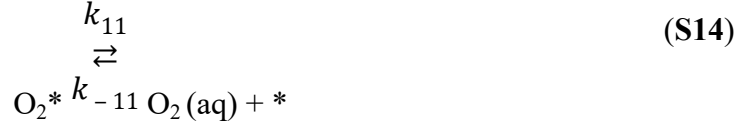

where  $k_i$  and  $k_{-i}$  are the rate constants of reaction and reverse reaction. According to the transition state theory,  $k_i$  and  $k_{-i}$  are calculated by:

$$k_i = A_i \exp\left(-\frac{\Delta G^\ddagger}{k_B T}\right) \quad (\text{S15})$$

$$k_{-i} = \frac{k_i}{K_i} \quad (\text{S16})$$

where  $A_i$  is the effective prefactor and  $K_i$  is the equilibrium constant. Considering all the rate equations are at the steady state, then the relationship between  $U$  and coverage ( $\theta$ ) at  $\text{pH} = 1$  and  $13$  can be obtained, and the current density is calculated by:

$$j = -2e\rho_{\text{Co}} \text{TOF}_{\text{H}_2\text{O}} \quad (\text{S17})$$

### S1.3 The formation energy $E_f$ and dissolution potential $U_{\text{diss}}$ calculations

The formation energy  $E_f$  and dissolution potential  $U_{\text{diss}}$  can be defined as:

$$E_f = E_{\text{M-TEP}} - E_{\text{M}} - E_{\text{TEP}} \quad (\text{S18})$$

$$U_{\text{diss}} = U_{\text{diss}}^{\circ}(\text{metal,bulk}) - \frac{E_f}{ne} \quad (\text{S19})$$

where  $E_{\text{M}}$  is the total energy of the metal atom in its most stable bulk structure,  $E_{\text{M-TEP}}$  and  $E_{\text{TEP}}$  are the total energies of substrate and substrate without metal center,  $U_{\text{diss}}^{\circ}$  and  $n$  are the standard dissolution potential of bulk metal and the number of electrons

involved in the dissolution, respectively.

## 2. Supporting Figures

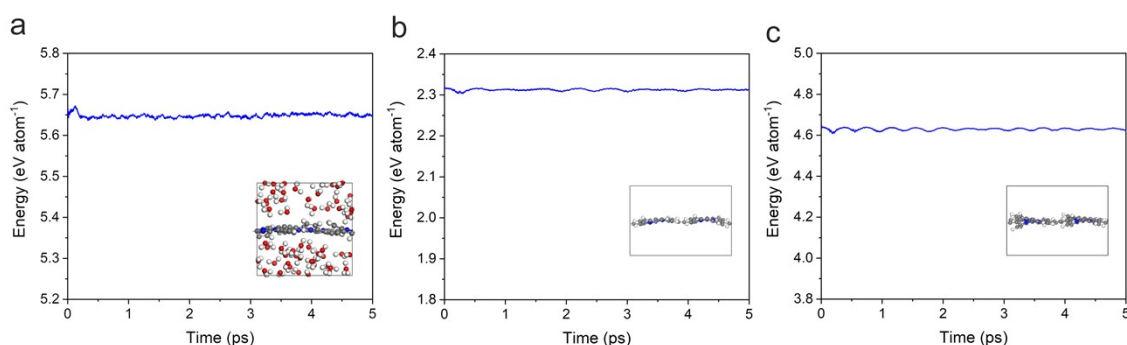

**Figure S1.** (a) Total potential energy fluctuation of 2D Co-TEP-COF at the end of a 5 ps ab initio molecular dynamic (AIMD) simulation at the temperature of 500 K. (b,c) Total potential energy fluctuation of 2x1x1 and 2x2x1 supercell at the end of a 5 ps ab initio molecular dynamic (AIMD) simulation at the temperature of 300 K.

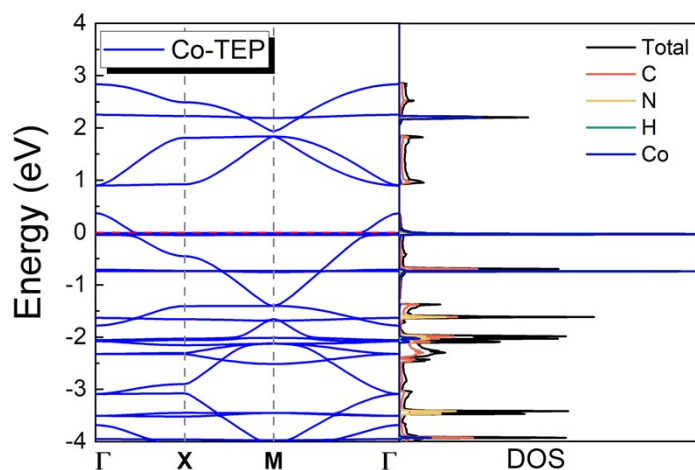

**Figure S2.** Band structure and density of states of 2D Co-TEP-COF.

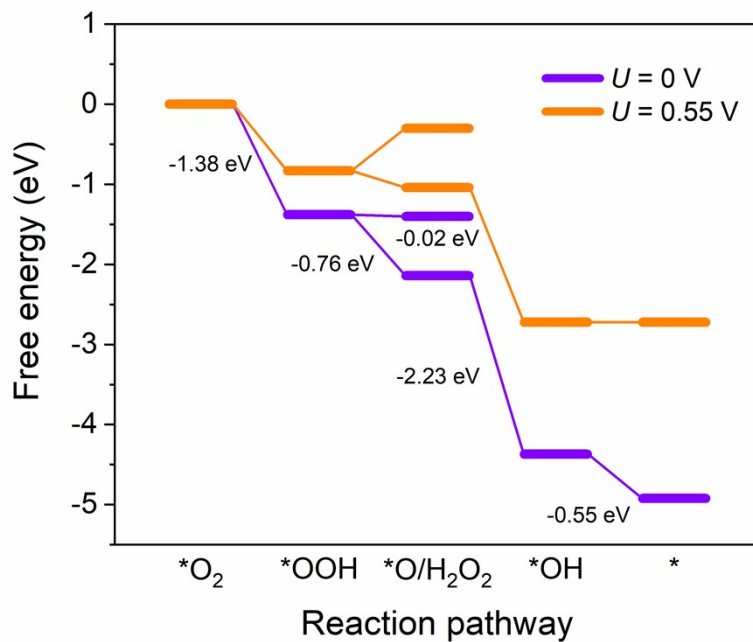

**Figure S3.** Free energy diagram for the ORR pathway on 2D Co-TEP COF.

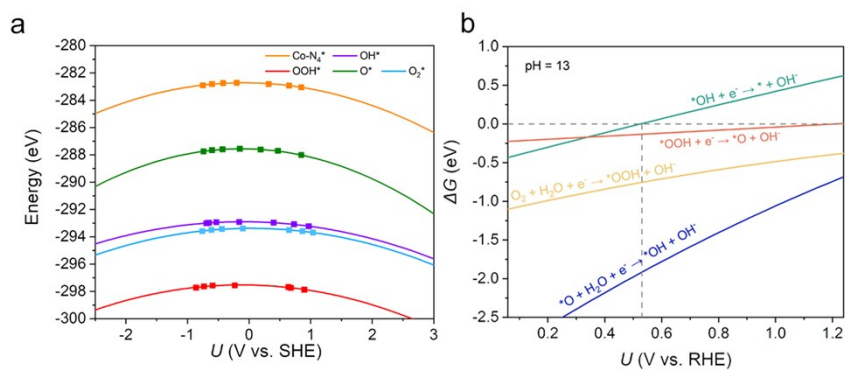

**Figure S4.** (a) The quadratic functions of the electrode potential  $U$  (V vs. SHE) and the total energy for 2D Co-TEP COF monolayer system. (b) Free energy changes for OER of 2D Co-TEP-CN COF monolayer at  $\text{pH} = 13$  as a function of potential.

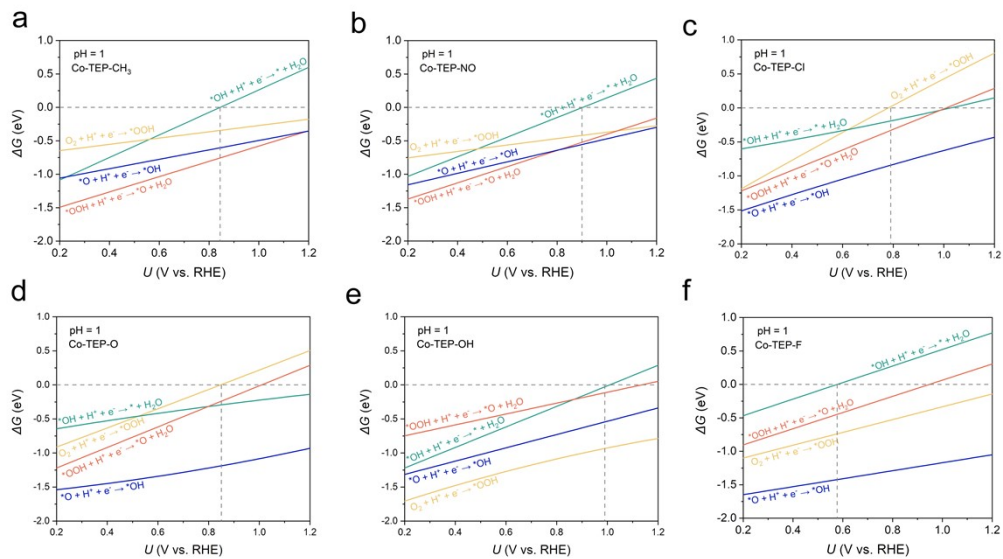

**Figure S5.** (a-f) Free energy changes for ORR of the 2D Co-TEP-X (X = O, OH, Cl, CH<sub>3</sub>, NO, F) COFs at pH = 1 as a function of potential.

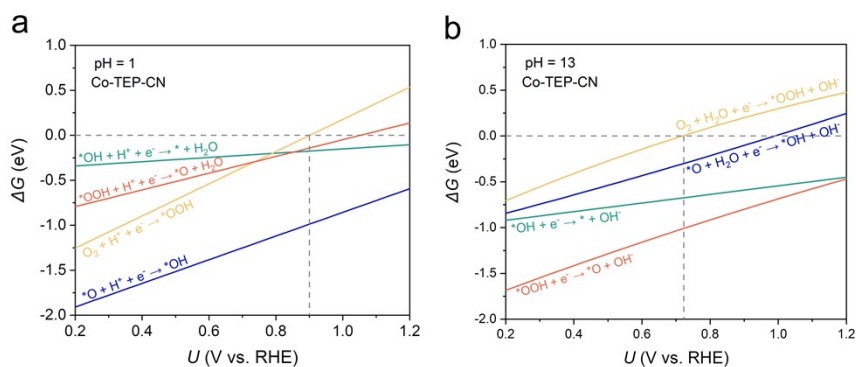

**Figure S6.** Free energy changes for ORR of 2D Co-TEP-CN COF monolayer at pH = 1 and 13 as a function of potential.

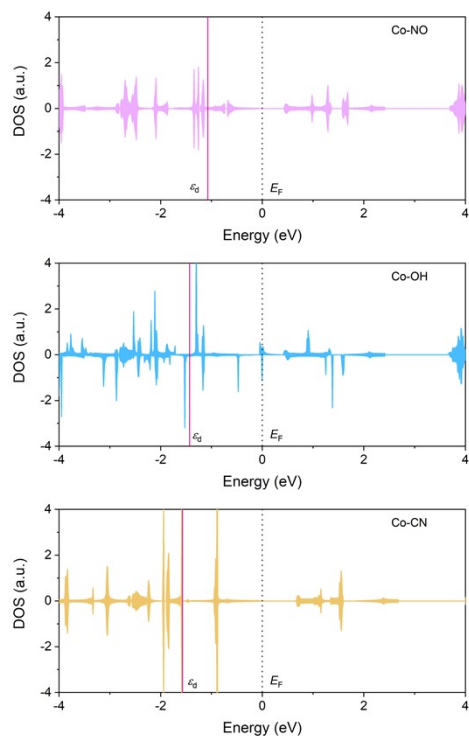

**Figure S7.** Density of states (DOS) of the 2D Co-TEP-X (X = NO, OH, CN) and their d-band center.

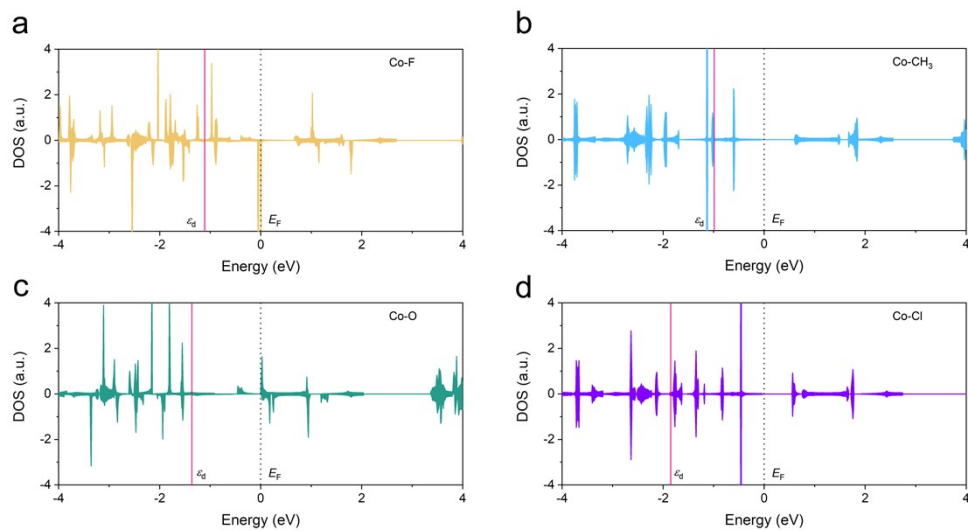

**Figure S8.** (a-d) Density of states (DOS) of the 2D Co-TEP-X (X = F, CH<sub>3</sub>, O, Cl) and their d-band center.

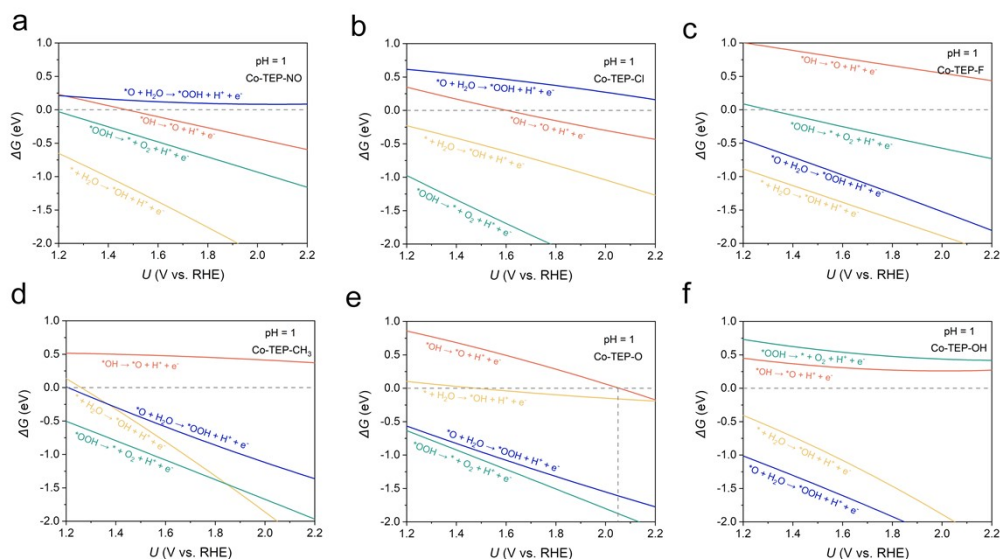

**Figure S9.** (a-f) Free energy changes for OER of the 2D Co-TEP-X (X = O, OH, Cl, CH<sub>3</sub>, NO, F) COFs at pH = 1 as a function of potential.

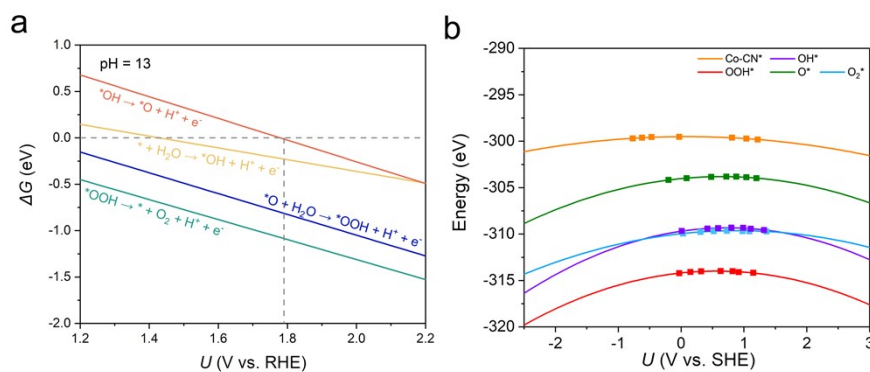

**Figure S10.** (a) Free energy changes for OER of 2D Co-TEP-CN COF monolayer at pH = 13 as a function of potential. (b) The quadratic functions of the electrode potential  $U$  (V vs. SHE) and the total energy for 2D Co-TEP-CN COF monolayer system.



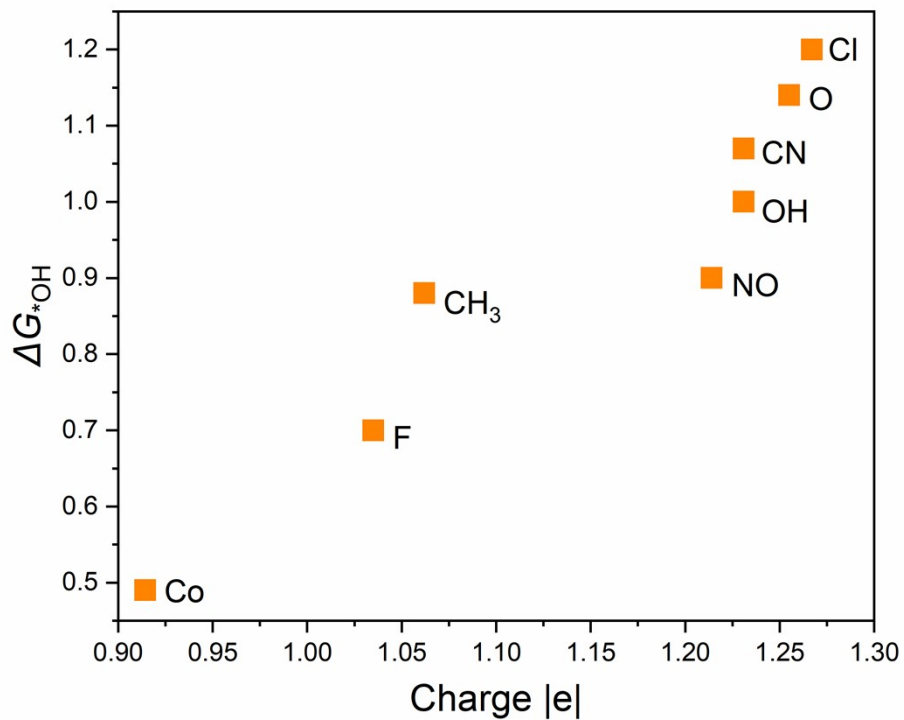

**Figure S11.** The relationship between calculated net charge values of Co in Co-TEP-X and the adsorption energy of \*OH ( $\Delta G_{*OH}$ ).

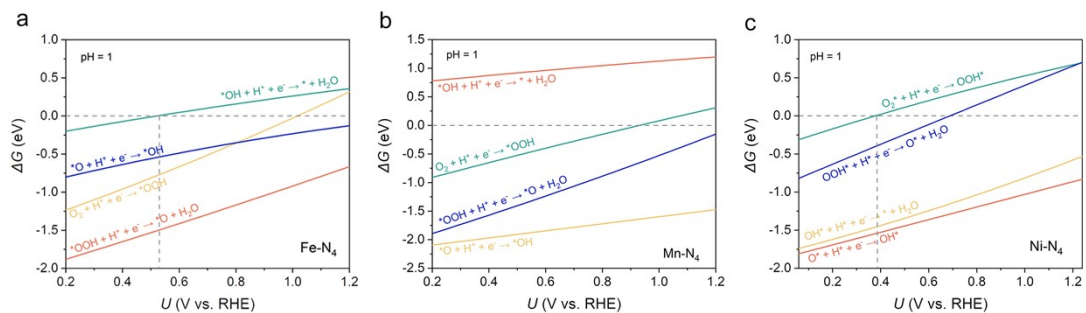

**Figure S12.** (a-c) Free energy changes for ORR of the 2D M-TEP COFs (M = Fe, Mn, Ni) at pH = 1 as a function of potential.

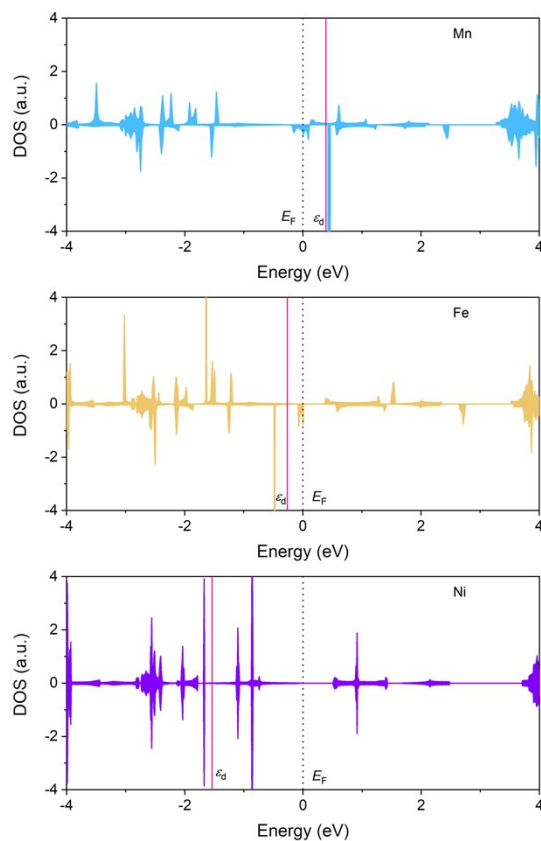

**Figure S13.** Density of states (DOS) of the 2D M-TEP COF (X = Mn, Fe, Ni) and their d-band center.

**Table S1.** Computed formation energy ( $E_f$ ) and dissolution potential ( $U_{diss}$ ) of metals. For comparison, standard dissolution potential ( $U_{diss}^0$ ) of metal atoms is also listed.

| M                | Cr    | Mn    | Fe    | Co    | Ni    |
|------------------|-------|-------|-------|-------|-------|
| $E_f$ (eV)       | -5.76 | -5.34 | -4.69 | -4.57 | -4.65 |
| $U_{diss}^0$ (V) | -0.91 | -1.19 | -0.45 | -0.28 | -0.26 |
| $U_{diss}$ (V)   | 1.97  | 1.48  | 1.90  | 2.01  | 2.07  |

### POSCAR of Optimized 2D Co-TEP-COF

POSCAR

```

1.0000000000000000
10.949999999999993 0.0000000000000000 0.0000000000000000
0.0000000000000000 10.949999999999993 0.0000000000000000
0.0000000000000000 0.0000000000000000 15.000000000000000
C N H Co

```

| 24                 | 4                  | 8                  | 1 |
|--------------------|--------------------|--------------------|---|
| Direct             |                    |                    |   |
| 0.4036136568969860 | 0.7555785151455066 | 0.4979554646360198 |   |
| 0.2886210811944596 | 0.8176413242337145 | 0.4980090807134385 |   |
| 0.2006686232759572 | 0.7298831879589948 | 0.4981430506158452 |   |
| 0.2625294057821775 | 0.6147374261743873 | 0.4981438681051820 |   |
| 0.5158604043262950 | 0.8173432026000308 | 0.4978031158495646 |   |
| 0.6280305303224523 | 0.7554455200866724 | 0.4976916079375195 |   |
| 0.7689512755702532 | 0.6144204357827212 | 0.4978137165811710 |   |
| 0.8309354446586246 | 0.7294782020622792 | 0.4974848734991708 |   |
| 0.7431048834366997 | 0.8173475548276574 | 0.4974022276636672 |   |
| 0.2625268709876143 | 0.3902402584986108 | 0.4980190635942953 |   |
| 0.2006974274203839 | 0.5024868777466340 | 0.4981585105158318 |   |
| 0.7689479237922202 | 0.3899246826254518 | 0.4981543943025197 |   |
| 0.8307712060716771 | 0.5021648347550777 | 0.4980577870432532 |   |
| 0.2005587717539197 | 0.2751618487760191 | 0.4978515875258094 |   |
| 0.2884063274629692 | 0.1873110493151585 | 0.4977026211048634 |   |
| 0.4034620902931061 | 0.2492286923526962 | 0.4978170616424507 |   |
| 0.8308092710155848 | 0.2747811335549344 | 0.4982709184547311 |   |
| 0.7428609976868006 | 0.1870222992189430 | 0.4981959295349065 |   |
| 0.6278690996625977 | 0.2490790540458561 | 0.4980362410412149 |   |
| 0.5156288499148716 | 0.1873091672596830 | 0.4978754233510674 |   |
| 0.5156357895979123 | 0.0582533570312628 | 0.4978222448089277 |   |
| 0.0716689117141903 | 0.5024227689346911 | 0.4982082050902293 |   |
| 0.9598157693646324 | 0.5022143474360983 | 0.4981512830788300 |   |
| 0.5158540292768378 | 0.9464004183205023 | 0.4977923074922616 |   |
| 0.3881503344386837 | 0.6300081029620425 | 0.4980259585763538 |   |
| 0.6433638199966373 | 0.6298483059896927 | 0.4978805873126450 |   |
| 0.3881254725130363 | 0.3748141085390059 | 0.4979748251794782 |   |
| 0.6433370942244869 | 0.3746473161308892 | 0.4980377461394113 |   |
| 0.1025529263578152 | 0.7413403068394173 | 0.4982119074104005 |   |
| 0.1024340608409819 | 0.2639047618086385 | 0.4978312540951311 |   |
| 0.2772661597341832 | 0.0891570534955685 | 0.4975432858224011 |   |
| 0.7538835436759654 | 0.0888522662142893 | 0.4982634513077968 |   |
| 0.2776014229176491 | 0.9158073924671144 | 0.4979305846330263 |   |
| 0.9290717843764318 | 0.7407006976355571 | 0.4972921364747138 |   |
| 0.7542842691929451 | 0.9154939110056537 | 0.4971225214063785 |   |
| 0.9289265703392556 | 0.2633434013261141 | 0.4983844735981330 |   |
| 0.5157539749126865 | 0.5023160798424163 | 0.4980006538613642 |   |

## References

- (1) Duan, Z.; Henkelman, G. Theoretical Resolution of the Exceptional Oxygen Reduction Activity of Au(100) in Alkaline Media. *ACS Catal.* **2019**, *9* (6), 5567-5573.
- (2) Duan, Z.; Henkelman, G. Surface Charge and Electrostatic Spin Crossover Effects in CoN<sub>4</sub> Electrocatalysts. *ACS Catal.* **2020**, *10* (20), 12148-12155.
- (3) Filhol, J. S.; Neurock, M. Elucidation of the Electrochemical Activation of Water Over Pd by First Principles. *Angew. Chem. Int. Ed.* **2006**, *118*, 416–420
- (4) Henkelman, G.; Uberuaga, B. P.; Jónsson, H. A Climbing Image Nudged Elastic Bband Method for Finding Saddle Points and Minimum Energy Paths. *J. Chem. Phys.* **2000**, *113* (22), 9901-9904.
- (5) Mathew, K.; Sundararaman, R.; Letchworth-Weaver, K.; Arias, T. A.; Hennig, R. G. Implicit Solvation Model for Density-Functional Study of Nanocrystal Surfaces and Reaction Pathways. *J. Chem. Phys.* **2014**, *140* (8), 084106.
- (6) Mathew, K.; Kolluru, V. S. C.; Mula, S.; Steinmann, S. N.; Hennig, R. G. Implicit Self-Consistent Electrolyte Model in Plane-Wave Density-Functional Theory. *J. Chem. Phys.* **2019**, *151* (23), 234101.
